# Supplementary material
Source: Springer Nature journal article supplement (https://www.springermedizin.de/resource/supplementary/13075_2013_4133_MOESM3_ESM.pdf/9696116)

**A**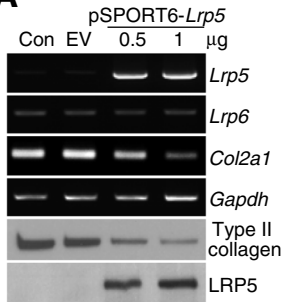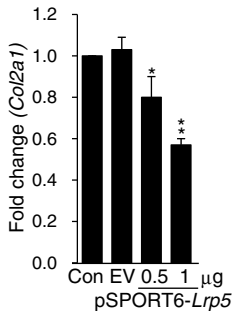**B**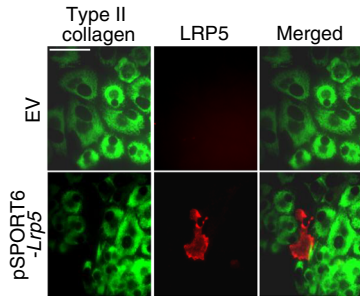**C**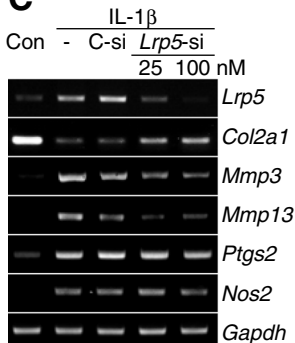**D**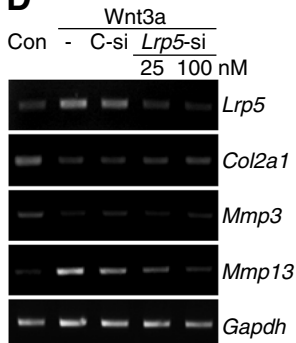**E**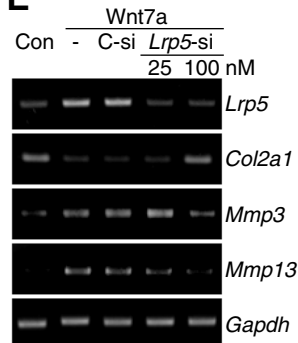

Supplement: MOESM3 [file 9696116]
